# Supplementary material
Source: PubMed Central journal article supplement (PMC3543754)
Supplement: NIHMS402041-supplement-appendix_3.pdf [file NIHMS402041-supplement-appendix_3.pdf]

### Appendix 3: Iterative Correlation Computation

This appendix describes in detail the computation of equation 4 from the text. Specifically, we will show that

$$r(n) = \left| \overline{P}^+ - \overline{P}^- \right| \quad (\text{B.1})$$

can be written by using recursive definitions for  $\overline{P}^+$  and  $\overline{P}^-$  as follows:

$$r(n) = \left| \frac{P_n^+}{\Omega_n^+} + \frac{\Omega_n^+ - I_n^+}{\Omega_n^+} \overline{P}_{n-1}^+ - \frac{P_n^-}{\Omega_n^-} - \frac{\Omega_n^- - I_n^-}{\Omega_n^-} \overline{P}_{n-1}^- \right|. \quad (\text{B.2})$$

where

$$\overline{P}_n^+ = \frac{1}{\Omega_n^+} \sum_{i=1}^n \theta^{n-i} P_i^+, \quad (\text{B.3})$$

$$\overline{P}_n^- = \frac{1}{\Omega_n^-} \sum_{i=1}^n \theta^{n-i} P_i^-, \quad (\text{B.4})$$

$$\Omega_n^+ = \sum_{i=1}^n I_i^+ \theta^{n-i}, \quad (\text{B.5})$$

$$\Omega_n^- = \sum_{i=1}^n I_i^- \theta^{n-i}. \quad (\text{B.6})$$

Here,  $\theta$  is a constant subject to the constraint  $\theta < 1$ .  $I_n^+$  and  $I_n^-$  are indicator functions defined by,

$$I_n^+ = \begin{cases} 1 & \text{if positive feedback was received on trial } n \\ 0 & \text{otherwise} \end{cases} \quad (\text{B.7})$$

and

$$I_n^- = \begin{cases} 1 & \text{if negative feedback was received on trial } n \\ 0 & \text{otherwise} \end{cases}. \quad (\text{B.8})$$

$P_n^+$  and  $P_n^-$  are the response confidence on trial  $n$  depending on whether positive or negative feedback was received on that trial. Specifically,

$$P_n^+ = \begin{cases} P_n & \text{if positive feedback was received on trial } n \\ 0 & \text{otherwise} \end{cases} \quad (\text{B.9})$$

and

$$P_n^- = \begin{cases} P_n & \text{if negative feedback was received on trial } n \\ 0 & \text{otherwise} \end{cases}. \quad (\text{B.10})$$

To begin, we show that  $\Omega_n^+$  and  $\Omega_n^-$  can be defined recursively as,

$$\Omega_n^+ = \theta\Omega_{n-1}^+ + I_n^+ \quad (\text{B.11})$$

and

$$\Omega_n^- = \theta\Omega_{n-1}^- + I_n^-. \quad (\text{B.12})$$

Proof:

By definition we can write,

$$\Omega_n^+ = \sum_{i=1}^n I_i^+ \theta^{n-i} \quad (\text{B.13})$$

and

$$\Omega_{n-1}^+ = \sum_{i=1}^{n-1} I_i^+ \theta^{n-1-i}. \quad (\text{B.14})$$

Next, we factor a  $\theta$  out of equation B.13,

$$\Omega_n^+ = \theta \sum_{i=1}^n I_i^+ \theta^{n-1-i} \quad (\text{B.15})$$

and pull the  $n$ th term out of the sum,

$$\Omega_n^+ = \theta \left[ \frac{I_n^+}{\theta} + \sum_{i=1}^{n-1} I_i^+ \theta^{n-1-i} \right]. \quad (\text{B.16})$$

Note that the second term inside the parentheses of equation B.16 is exactly  $\Omega_{n-1}^+$ , as defined in equation B.14. Thus, we find that

$$\Omega_n^+ = \theta\Omega_{n-1}^+ + I_n^+. \quad (\text{B.17})$$

The proof for equation B.12 follows identical steps.

We now show that  $\bar{P}_n^+$  and  $\bar{P}_n^-$  can be defined recursively as,

$$\bar{P}_n^+ = \frac{P_n^+}{\Omega_n^+} + \frac{\Omega_n^+ - I_n^+}{\Omega_n^+} \bar{P}_{n-1}^+ \quad (\text{B.18})$$

and

$$\bar{P}_n^- = \frac{P_n^-}{\Omega_n^-} + \frac{\Omega_n^- - I_n^-}{\Omega_n^-} \bar{P}_{n-1}^-. \quad (\text{B.19})$$

Proof: By definition we write,

$$\bar{P}_n^+ = \frac{1}{\Omega_n^+} \sum_{i=1}^n \theta^{n-i} P_i^+ \quad (\text{B.20})$$

and

$$\bar{P}_{n-1}^+ = \frac{1}{\Omega_{n-1}^+} \sum_{i=1}^{n-1} \theta^{n-1-i} P_i^+. \quad (\text{B.21})$$

Next, we factor a  $\theta$  out of equation B.20,

$$\overline{P}_n^+ = \frac{\theta}{\Omega_n^+} \sum_{i=1}^n \theta^{n-1-i} P_i^+ \quad (\text{B.22})$$

and then pull the  $n$ th term out of the sum,

$$\overline{P}_n^+ = \frac{P_n^+}{\Omega_n^+} + \frac{\theta}{\Omega_n^+} \sum_{i=1}^{n-1} \theta^{n-1-i} P_i^+. \quad (\text{B.23})$$

By multiplying the numerator and denominator of the second term in equation B.23 by  $\Omega_{n-1}^+$ , we get

$$\overline{P}_n^+ = \frac{P_n^+}{\Omega_n^+} + \frac{\theta \Omega_{n-1}^+}{\Omega_n^+} \left[ \frac{1}{\Omega_{n-1}^+} \sum_{i=1}^{n-1} \theta^{n-1-i} P_i^+ \right]. \quad (\text{B.24})$$

Note that the term inside the parentheses in equation B.24 is exactly  $\overline{P}_{n-1}^+$ . Thus,

$$\overline{P}_n^+ = \frac{P_n^+}{\Omega_n^+} + \frac{\theta \Omega_{n-1}^+}{\Omega_n^+} \overline{P}_{n-1}^+. \quad (\text{B.25})$$

Finally, solving equation B.11 for  $\Omega_{n-1}^+$ , and substituting into equation B.25 we get,

$$\overline{P}_n^+ = \frac{P_n^+}{\Omega_n^+} + \frac{\Omega_n^+ - I_n^+}{\Omega_n^+} \overline{P}_{n-1}^+. \quad (\text{B.26})$$

Thus, equation B.1 becomes,

$$r(n) = \left| \frac{P_n^+}{\Omega_n^+} + \frac{\Omega_n^+ - I_n^+}{\Omega_n^+} \overline{P}_{n-1}^+ - \frac{P_n^-}{\Omega_n^-} - \frac{\Omega_n^- - I_n^-}{\Omega_n^-} \overline{P}_{n-1}^- \right|. \quad (\text{B.27})$$
